# Supplementary material
Source: PubMed Central journal article supplement (PMC2970622)
Supplement: NIHMS246038-supplement-Figure_S2.pdf [file NIHMS246038-supplement-Figure_S2.pdf]

## 1. Performing hPSC culture on-chip

- 1-1. Sterilize a microfluidic hPSC array
- 1-2. Coat the ECM on the cell culture chambers using an electrical pipette (4  $\mu\text{L}$  of each solution, 6  $\mu\text{L sec}^{-1}$  of dispensing rate) at 4°C for overnight.
- 1-3. Passage hPSCs cultured in a 6-well plate mechanically or enzymatically with collagenase type IV.
- 1-4. Load the solution containing hPSCs into the cell culture chambers.
- 1-5. A few hours after hPSC loading, change medium for every 12 hours using an electrical pipette.

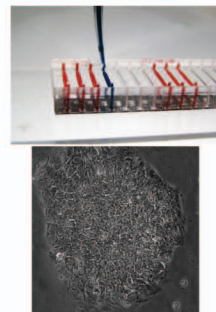

## 2. On-chip immunocytochemistry

- 2-1. Fix hPSC colonies with 4% paraformaldehyde in a microfluidic hPSC array.
- 2-2. Permeabilize hPSCs with PBS containing 0.5% Triton X100 at room temperature for 30 min.
- 2-3. Incubate the blocking solution.
- 2-4. Incubate the solution containing primary antibodies.
- 2-5. Incubate the solution containing secondary antibodies.
- 2-6. Incubate 300 nM of DAPI solution.
- 2-7 Obtain image sets of BF, DAPI, OCT4 and SSEA1 (MetaMorph).

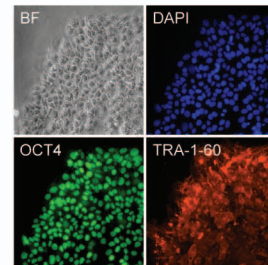

## 3. Segmentation & Quantification (CellProfiler)

- 3-1. Identify cells in each image using DAPI channel.
- 3-2. Quantify OCT4/SSEA1 fluorescent intensity in each cell.
- 3-3. Export quantified data to Excel.

## 4. Histogram (Excel & Origin)

- 4-1. Transform the value of fluorescent intensity (Mean intensity units) of individual cells from linear scale to log scale.
- 4-2. Draw a histogram of transformed fluorescent intensity in individual cells.

## 5. Hierarchical clustering & Heat map (TIRG MeV)

- 5-1. Make average of fluorescent intensity of OCT4/SSEA1 in individual cells for each sample.
- 5-2. Construct a hierarchy of sample groups represented by a dendrogram.
- 5-3. Display the values of averaged fluorescent intensity of each sample in a heat map.
